# Supplementary material for: Navigating Climate Adaptation on Public Lands: How Views on Ecosystem Change and Scale Interact with Management Approaches
Source: Springer Nature journal article supplement (doi:10.1007/s00267-020-01336-y), 2020-07-29
Supplement: MOESM1 [file 18230888]

Appendix 2: Number of Interview and Focus Group Participants from Each Agency.

| Agency                                       | Interview Participants | Focus Group Participants |
|----------------------------------------------|------------------------|--------------------------|
| Bureau of Land Management (BLM)              | 7                      | 5                        |
| U.S. Forest Service (USFS)                   | 7                      | 6                        |
| Natural Resource Conservation Service (NRCS) | 2                      | 1                        |
| National Park Service (NPS)                  | 2                      | 3                        |
| State Agencies (forestry and wildlife)       | 2                      | 3                        |
