# Supplementary material for: Navigating Climate Adaptation on Public Lands: How Views on Ecosystem Change and Scale Interact with Management Approaches
Source: Springer Nature journal article supplement (doi:10.1007/s00267-020-01336-y), 2020-07-29
Supplement: MOESM5 [file 18230888]

## Appendix 5: Codes from interview and focus group analysis

Here we provide the codes used to analyze the transcripts from interviews and focus groups. These codes include both *a priori* and emergent codes and the lead author coded the materials in multiple iterations to ensure that all transcripts were coded for emergent codes.

| Code:                      | Description                                                                                                                                             |
|----------------------------|---------------------------------------------------------------------------------------------------------------------------------------------------------|
| Adaptation                 | General discussion of social or ecological adaptation in response to climate change                                                                     |
| Approach to Change         | Responses to climate change and how people framed them                                                                                                  |
| Barrier                    | Barriers to adaptation and management in the context of climate change                                                                                  |
| Climate Science            | Views about and responses to climate science                                                                                                            |
| Ecology                    | Ecological systems and interactions between different species within the terrestrial system                                                             |
| Extremes                   | Extreme events and natural hazards                                                                                                                      |
| Feedback                   | Feedback offered about the process at the end of the focus group sessions                                                                               |
| Flexibility                | Discussions of flexibility and inflexibility in terms of regulations, management, and individual actions                                                |
| Grazing                    | Grazing practices, management, and impacts                                                                                                              |
| Landscape change           | Landscape transformation, state changes, and regime shifts                                                                                              |
| Management                 | Resource management practices, strategies, and objectives                                                                                               |
| No regrets                 | Framing and discussions of “no regrets” strategies                                                                                                      |
| Recreation                 | Outdoor recreation activities, business operations, and relationship to resource management and public lands                                            |
| Relationship with agencies | The relationships between different resource agencies, and the relationships between agencies and resource users                                        |
| Sagebrush                  | Discussion of the sagebrush system, which was one of the targets for the broader research project                                                       |
| Sage grouse                | Discussion of the Gunnison Sage grouse which were pending endangered or threatened listing                                                              |
| Scale and Boundaries       | How temporal and geographic scale and boundaries impacted management, use of information, climate adaptation, and other elements of managing for change |
| Scientific Knowledge       | How people talked about science, including how they used it, their thoughts about it, and barriers to using it                                          |
| Spruce Fir                 | Responses directly about the spruce-fir system, which was one of the targets for the broader research project                                           |
| Strategy                   | Strategies for how to adapt to climate change, particularly management approaches                                                                       |
| Tensions                   | Conversations about local disagreements that highlighted differences of opinions. This focused on a number of local issues                              |

|                 |                                                                                                                                            |
|-----------------|--------------------------------------------------------------------------------------------------------------------------------------------|
|                 | including endangered species issues, climate change politics, different approaches to management, etc.                                     |
| Uncertainty     | Responses that directly discussed future uncertainty or a range of future conditions                                                       |
| Vulnerability   | Discussions of both ecological vulnerabilities and social vulnerabilities due to climate change                                            |
| Water Resources | Specific responses about water resources and use in the Basin                                                                              |
| Wildlife        | Discussions of wildlife in the Basin, primarily how they would be impacted by climate change and how to manage populations in that context |
